# Supplementary material for: Enhancing Light Harvesting in Dye-Sensitized Solar Cells through Mesoporous Silica Nanoparticle-Mediated Diffuse Scattering Back Reflectors
Source: MDPI journal article supplement (doi:10.3390/electronicmat4030010), 2023-08-30
Supplement: s1 [file s1]

## Supplementary Information of

Article

# Enhancing light harvesting in Dye-Sensitized Solar Cells through Mesoporous Silica Nanoparticle-mediated Diffuse Scattering Back Reflectors

Jeffrie Fina <sup>1</sup>, Navdeep Kaur <sup>1</sup>, Chen-Yu Chang <sup>1</sup>, Cheng-Yu Lai <sup>1</sup>, and Daniela R. Radu<sup>1\*</sup>

<sup>1</sup> Department of Mechanical and Materials Engineering, Florida International University, Florida 33174, United States

\* Correspondence: e-mail@e-mail.com; Tel.: (optional; include country code; if there are multiple corresponding authors, add author initials)

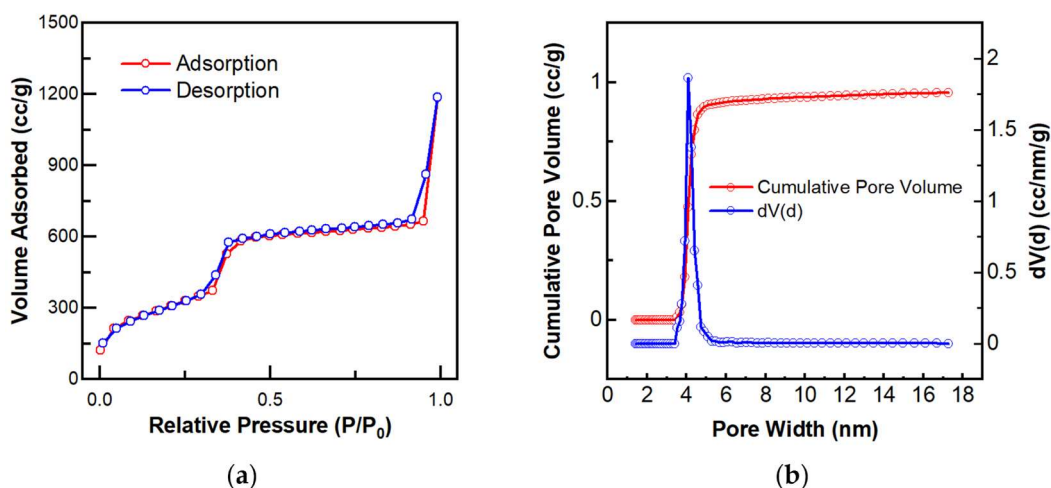

**Fig S1.** (a) Nitrogen adsorption–desorption isotherms (b) pore size distribution calculated by the DFT method

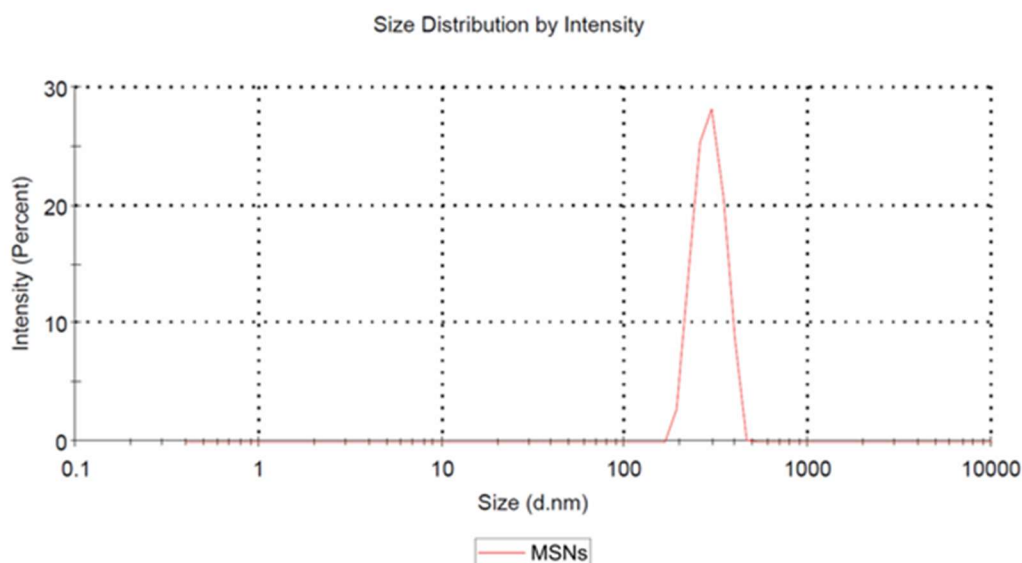

**Fig S2.** DLS distribution curve of MSNs dispersed in ethanol.

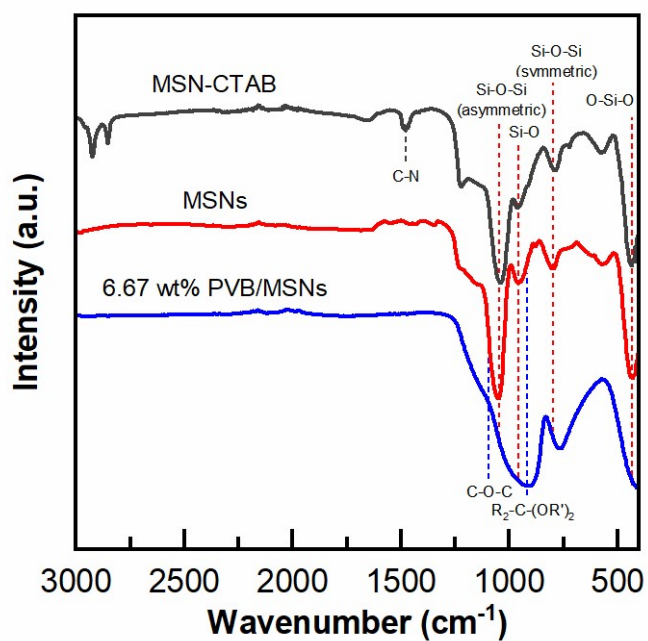

Fig S3. FTIR spectra of MSN with CTAB surfactant (as synthesized), MSNs (after acid wash), and 6.67 wt% PVB/MSN. [36, 37]

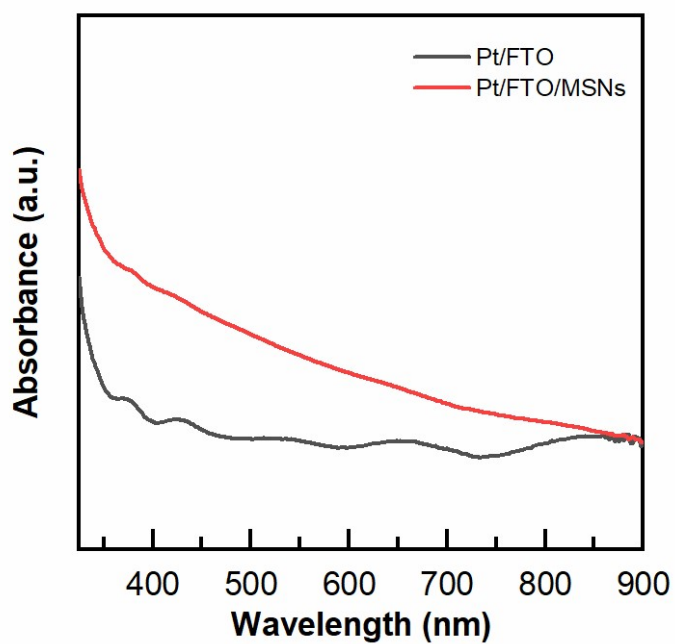

Fig S4. UV-Visible absorbance spectrum of platinum counter-electrodes with and without MSNs reflector film.
